# Supplementary material
Source: PubMed Central journal article supplement (PMC4680391)
Supplement: ijcep0008-12571-f6.pdf [file ijcep0008-12571-f6.pdf]

MicroRNA-214 targets PCBP2 in glioma

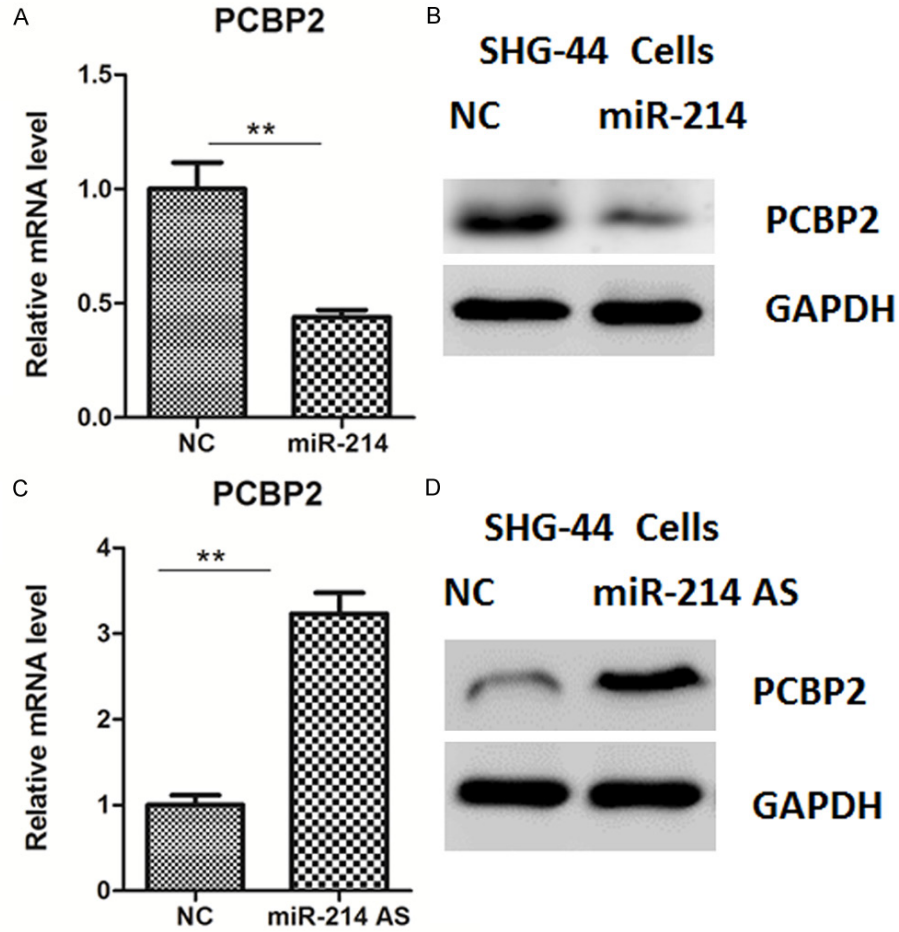

**Supplementary Figure 1.** (A, B) mRNA (A) and protein (B) levels of PCBP2 in SHG-44 cells transfected with miR-214 mimics or negative control (NC) for 24 or 48 hr, respectively. (C, D) mRNA (C) and protein (D) levels of PCBP2 in SHG-44 cells transfected with miR-214 antisense oligos or negative control (NC) for 24 or 48 hr, respectively.

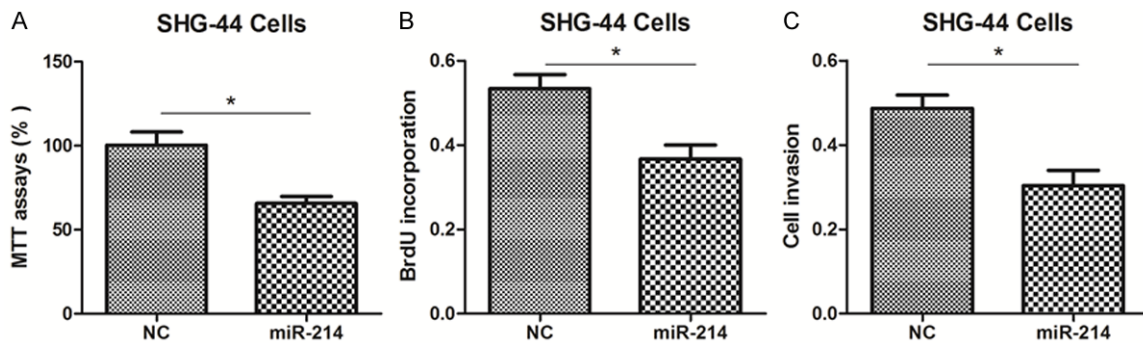

**Supplementary Figure 2.** (A-C) The cell viability (A), proliferative potential (B) and invasion abilities were determined in SHG-44 cells transfected with miR-214 mimics or negative control (NC).

MicroRNA-214 targets PCBP2 in glioma

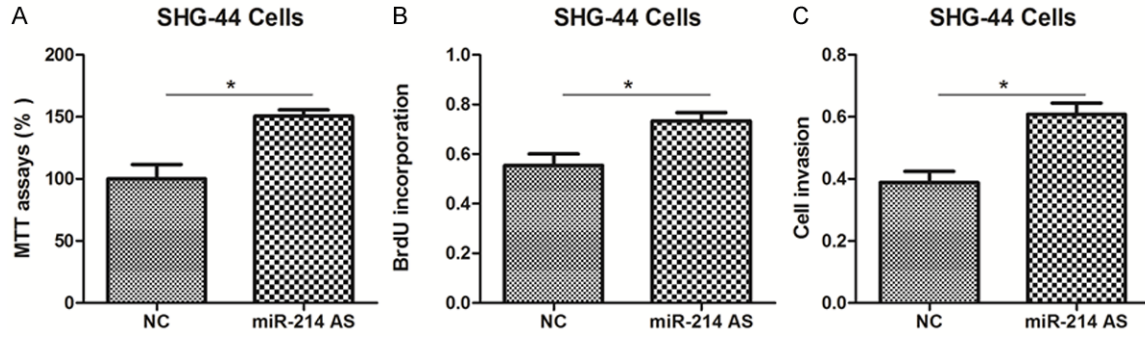

**Supplementary Figure 3.** (A-C) The cell viability (A), proliferative potential (B) and invasion abilities were determined in SHG-44 cells transfected with miR-214 antisense or negative control (NC).
